# Supplementary material for: The Effect of Changing Climatic Conditions on the Morphological Traits and Chemical Composition of Almond Kernels
Source: MDPI journal article supplement (doi:10.3390/horticulturae8060487), 2022-05-31
Supplement: s1 [file s1]

**Table S1.** Pearson's correlation coefficients (R) among composition of tocopherols, oil content, macro and micro elements (2014).

|                     | $\beta$ T+ $\gamma$ | $\delta$ T | TT          | O   | K   | Na  | Mg  | Ca  | P     | Cr  | Cu  | Fe  | Mn          | Zn          | Mo  |
|---------------------|---------------------|------------|-------------|-----|-----|-----|-----|-----|-------|-----|-----|-----|-------------|-------------|-----|
| $\alpha$ T          | <b>0.89*</b>        | 0.1        | <b>1.00</b> | 0.2 | -   | -   | -   | 0.0 | -0.02 | 0.0 | 0.5 | 0.4 | 0.15        | 0.60        | 0.3 |
| $\beta$ T+ $\gamma$ |                     | 0.2        | <b>0.90</b> | 0.2 | 0.1 | -   | -   | 0.0 | -0.11 | 0.1 | 0.4 | 0.3 | 0.05        | 0.50        | 0.2 |
| $\delta$ T          |                     |            | 0.16        | 0.2 | -   | -   | -   | -   | -0.06 | 0.0 | 0.6 | -   | -           | -           | -   |
| TT                  |                     |            |             | 0.2 | -   | -   | -   | 0.0 | -0.03 | 0.0 | 0.5 | 0.4 | 0.13        | 0.60        | 0.3 |
| OC                  |                     |            |             |     | 0.0 | 0.3 | -   | 0.3 | -     | 0.0 | 0.2 | -   | -0.22       | -           | -   |
| K                   |                     |            |             |     |     | 0.2 | 0.4 | 0.3 | 0.03  | 0.4 | -   | 0.0 | 0.21        | 0.25        | -   |
| Na                  |                     |            |             |     |     |     | 0.0 | 0.5 | -0.04 | 0.2 | -   | 0.0 | 0.46        | 0.11        | -   |
| Mg                  |                     |            |             |     |     |     |     | 0.2 | -0.03 | -   | 0.3 | 0.2 | 0.16        | 0.24        | -   |
| Ca                  |                     |            |             |     |     |     |     |     | -0.56 | -   | -   | 0.3 | <b>0.77</b> | 0.32        | 0.1 |
| P                   |                     |            |             |     |     |     |     |     |       | 0.6 | -   | 0.3 | 0.04        | 0.38        | -   |
| Cr                  |                     |            |             |     |     |     |     |     |       |     | -   | -   | -0.18       | 0.14        | -   |
| Cu                  |                     |            |             |     |     |     |     |     |       |     |     | 0.1 | -0.34       | 0.39        | -   |
| Fe                  |                     |            |             |     |     |     |     |     |       |     |     |     | <b>0.77</b> | <b>0.88</b> | 0.5 |
| Mn                  |                     |            |             |     |     |     |     |     |       |     |     |     |             | 0.60        | 0.4 |
| Zn                  |                     |            |             |     |     |     |     |     |       |     |     |     |             |             | 0.1 |

\* significant at  $p < 0.01$ .  $\alpha$ T—alpha tocopherol;  $\beta$ T+ $\gamma$ T—beta + gamma tocopherol;  $\delta$ T—delta tocopherol; TT—total tocopherols; OC—oil content.

**Table S2.** Pearson's correlation coefficients (R) among composition of tocopherols, oil content, macro and micro elements with kernel morphological characteristics and climate parameters (2014).

|            | K   | KL         | KW   | KT   | KR  | SV         | SMD          | AS          | ASM          | ADR          | AAD           | SMDR          | ASMD          |
|------------|-----|------------|------|------|-----|------------|--------------|-------------|--------------|--------------|---------------|---------------|---------------|
| $\alpha$ T | -   | 0.1        | -    | -    | -   | 0.2        | 0.34         | -           | 0.26         | -0.04        | 0.20          | 0.28          | 0.15          |
| $\beta$ T+ | 0.2 | 0.3        | 0.18 | -    | 0.2 | 0.2        | 0.21         | -           | 0.33         | -0.31        | 0.31          | 0.21          | 0.21          |
| $\delta$ T | 0.3 | -          | -    | 0.50 | 0.2 | -          | -0.35        | 0.34        | <b>0.85*</b> | 0.05         | <b>-0.71*</b> | -0.43         | -0.23         |
| TT         | -   | 0.1        | -    | -    | 0.0 | 0.2        | 0.33         | -           | 0.27         | -0.05        | 0.19          | 0.27          | 0.15          |
| OC         | 0.3 | 0.0        | 0.50 | 0.53 | 0.6 | 0.5        | <b>0.73*</b> | <b>0.71</b> | 0.33         | 0.50         | -0.13         | <b>-0.80*</b> | -0.15         |
| K          | 0.3 | 0.5        | 0.14 | 0.26 | 0.6 | 0.4        | 0.14         | -           | -0.10        | <b>-0.72</b> | 0.45          | -0.12         | -0.04         |
| Na         | -   | -          | 0.04 | -    | 0.1 | 0.4        | 0.67         | 0.25        | -0.54        | 0.24         | 0.24          | -0.34         | -0.33         |
| Mg         | 0.0 | <b>0.7</b> | -    | -    | -   | 0.3        | -0.13        | -           | 0.29         | -0.50        | -0.29         | 0.12          | 0.46          |
| Ca         | 0.0 | 0.5        | 0.50 | -    | -   | <b>0.8</b> | 0.74         | -           | -0.23        | 0.08         | 0.34          | 0.04          | 0.56          |
| P          | -   | -          | -    | -    | -   | -          | -0.50        | -           | -0.39        | -0.52        | 0.25          | 0.50          | -0.49         |
| Cr         | -   | -          | -    | 0.45 | 0.5 | -          | -0.06        | -           | -0.32        | -0.39        | 0.42          | -0.17         | <b>-0.85*</b> |
| Cu         | 0.0 | 0.4        | -    | -    | -   | 0.3        | 0.08         | -           | <b>0.88*</b> | -0.14        | -0.58         | -0.10         | 0.20          |
| Fe         | -   | 0.2        | -    | -    | -   | 0.2        | 0.14         | -           | -0.26        | -0.40        | 0.38          | <b>0.83*</b>  | 0.43          |
| Mn         | -   | 0.2        | 0.18 | -    | -   | 0.4        | 0.45         | -           | -0.63        | -0.18        | 0.65          | 0.57          | 0.43          |
| Zn         | -   | 0.3        | -    | -    | -   | 0.4        | 0.32         | -           | -0.08        | -0.52        | 0.35          | 0.55          | 0.18          |
| Mo         | -   | 0.1        | 0.23 | -    | -   | -          | -0.22        | -           | -0.16        | 0.11         | 0.19          | <b>0.75*</b>  | 0.67          |

\* significant at  $p < 0.01$ .  $\alpha$ T - alfa tocopherol;  $\beta$ T+ $\gamma$ T- beta + gamma tocopherol;  $\delta$ T—delta tocopherol; TT—total tocopherols; OC—oil content; KW—kernel weight; KL—kernel length; KWd— kernel width; KT—kernel thickness; KR—kernel ratio; SVR—the sum of precipitation during vegetation; SMDTV—the sum of mean daily temperatures during vegetation; ASP—the annual sum of precipitation; ASMDT—the annual sum of mean daily temperatures; ADRHV—average daily relative humidity during vegetation; AADRH—annual average daily relative humidity; SMDRHV—the sum of mean daily relative humidity during vegetation; ASMDRH—the annual sum of mean daily relative humidity.

**Table S3.** Pearson's correlation coefficients (R) among kernel morphological characteristics and climate parameters (2014).

|              | KL   | KW   | KT    | KR           | SVR   | SM           | ASP   | AS    | AD           | AA    | SMD           | ASM          |
|--------------|------|------|-------|--------------|-------|--------------|-------|-------|--------------|-------|---------------|--------------|
| <b>KW</b>    | 0.49 | 0.69 | 0.61  | 0.57         | 0.06  | -0.14        | 0.21  | 0.40  | -0.07        | -0.04 | -0.36         | 0.31         |
| <b>KL</b>    |      | 0.23 | -0.22 | 0.05         | 0.64  | 0.15         | -0.33 | 0.43  | -0.45        | -0.02 | 0.13          | <b>0.76*</b> |
| <b>KWd</b>   |      |      | 0.32  | 0.41         | 0.22  | 0.33         | 0.29  | -0.17 | 0.30         | 0.39  | -0.23         | 0.34         |
| <b>KT</b>    |      |      |       | <b>0.84*</b> | -0.20 | -0.10        | 0.53  | 0.23  | 0.13         | -0.13 | <b>-0.78*</b> | -0.55        |
| <b>KR</b>    |      |      |       |              | 0.24  | 0.27         | 0.29  | 0.12  | -0.11        | 0.22  | -0.69         | -0.45        |
| <b>SVR</b>   |      |      |       |              |       | <b>0.83*</b> | 0.04  | 0.17  | -0.04        | 0.09  | -0.23         | 0.34         |
| <b>SMDTV</b> |      |      |       |              |       |              | 0.33  | -0.09 | 0.37         | 0.19  | -0.36         | 0.03         |
| <b>ASP</b>   |      |      |       |              |       |              |       | 0.28  | <b>0.86*</b> | -0.55 | <b>-0.84*</b> | -0.26        |
| <b>ASMDT</b> |      |      |       |              |       |              |       |       | 0.04         | -     | -0.35         | 0.23         |
| <b>ADRHV</b> |      |      |       |              |       |              |       |       |              | -0.39 | -0.46         | -0.08        |
| <b>AADRH</b> |      |      |       |              |       |              |       |       |              |       | 0.42          | -0.04        |
| <b>SMDRH</b> |      |      |       |              |       |              |       |       |              |       |               | 0.45         |

\* significant at  $p < 0.01$ . KW—kernel weight; KL—kernel length; KWd—kernel width; KT—kernel thickness; KR—kernel ratio; SVR—the sum of precipitation during vegetation; SMDTV—the sum of mean daily temperatures during vegetation; ASP—the annual sum of precipitation; ASMDT—the annual sum of mean daily temperatures; ADRHV—average daily relative humidity during vegetation; AADRH—annual average daily relative humidity; SMDRH—the sum of mean daily relative humidity during vegetation; ASMDRH—the annual sum of mean daily relative humidity.

**Table S4.** Pearson's correlation coefficients (R) among composition of tocopherols, oil content, macro and micro elements (2015).

|                     | $\beta$ T+ $\gamma$ | $\delta$ T | TT          | OC  | K   | Na  | Mg  | Ca  | P   | Cr          | Cu  | Fe          | Mn  | Zn          | Mo          |
|---------------------|---------------------|------------|-------------|-----|-----|-----|-----|-----|-----|-------------|-----|-------------|-----|-------------|-------------|
| $\alpha$ T          | 0.32                | 0.0        | <b>1.00</b> | 0.4 | 0.6 | 0.3 | -   | -   | -   | -           | -   | -0.46       | -   | 0.27        | 0.43        |
| $\beta$ T+ $\gamma$ |                     | 0.2        | 0.35        | 0.1 | -   | -   | -   | 0.2 | -   | -           | -   | -           | -   | -           | 0.40        |
| $\delta$ T          |                     |            | 0.11        | -   | 0.5 | 0.0 | 0.2 | -   | -   | -           | -   | -0.20       | -   | 0.61        | <b>0.75</b> |
| TT                  |                     |            |             | 0.4 | 0.6 | 0.2 | -   | -   | -   | -           | -   | -0.48       | -   | 0.27        | 0.45        |
| OC                  |                     |            |             |     | -   | 0.2 | -   | 0.4 | -   | -           | 0.0 | -0.29       | 0.1 | -           | -           |
| K                   |                     |            |             |     |     | 0.4 | 0.2 | -   | 0.1 | -           | -   | 0.00        | -   | <b>0.80</b> | 0.60        |
| Na                  |                     |            |             |     |     |     | 0.2 | 0.3 | 0.6 | 0.38        | 0.1 | 0.56        | 0.4 | 0.41        | -           |
| Mg                  |                     |            |             |     |     |     |     | 0.2 | 0.6 | 0.20        | -   | 0.51        | 0.4 | 0.52        | 0.49        |
| Ca                  |                     |            |             |     |     |     |     |     | 0.4 | 0.40        | -   | 0.31        | 0.2 | -           | -           |
| P                   |                     |            |             |     |     |     |     |     |     | <b>0.81</b> | 0.1 | <b>0.93</b> | 0.3 | 0.16        | -           |
| Cr                  |                     |            |             |     |     |     |     |     |     |             | 0.5 | <b>0.91</b> | 0.2 | -           | -           |
| Cu                  |                     |            |             |     |     |     |     |     |     |             |     | 0.28        | -   | -           | -           |
| Fe                  |                     |            |             |     |     |     |     |     |     |             |     |             | 0.4 | 0.15        | -           |
| Mn                  |                     |            |             |     |     |     |     |     |     |             |     |             |     | 0.37        | -           |
| Zn                  |                     |            |             |     |     |     |     |     |     |             |     |             |     |             | 0.60        |

\* significant at  $p < 0.01$ .  $\alpha$ T—alpha tocopherol;  $\beta$ T+ $\gamma$ T—beta + gamma tocopherol;  $\delta$ T—delta tocopherol; TT—total tocopherols; OC—oil content.

**Table S5.** Pearson's correlation coefficients (R) among composition of tocopherols, oil content, macro and micro elements with kernel morphological characteristics and climate parameters (2015).

|            | K          | KL  | K   | KT   | KR          | SV          | SMD           | AS         | ASM   | ADR          | AAD          | SMDR          | ASMD          |
|------------|------------|-----|-----|------|-------------|-------------|---------------|------------|-------|--------------|--------------|---------------|---------------|
| $\alpha$ T | -          | -   | -   | 0.03 | 0.02        | -           | -0.42         | -          | 0.27  | 0.12         | 0.14         | -0.05         | 0.02          |
| $\beta$ T+ | 0.2        | -   | -   | 0.31 | 0.23        | -           | 0.21          | -          | 0.50  | 0.28         | 0.11         | -0.01         | 0.29          |
| $\delta$ T | -          | 0.6 | -   | -    | -           | -           | -0.51         | 0.4        | -0.27 | -0.26        | 0.05         | 0.07          | 0.67          |
| TT         | -          | -   | -   | 0.03 | 0.02        | -           | -0.42         | -          | 0.27  | 0.12         | 0.14         | -0.05         | 0.04          |
| OC         | 0.0        | -   | -   | 0.67 | 0.66        | -           | 0.06          | -          | 0.17  | 0.64         | 0.38         | -0.11         | -0.46         |
| K          | -          | 0.0 | -   | -    | -           | -           | <b>-0.80*</b> | 0.0        | -0.10 | -0.25        | 0.03         | -0.04         | 0.23          |
| Na         | 0.0        | 0.1 | -   | 0.19 | 0.39        | 0.38        | <b>-0.78*</b> | 0.2        | 0.09  | 0.53         | <b>0.72*</b> | -0.66         | -0.61         |
| Mg         | 0.1        | 0.1 | 0.5 | -    | -           | 0.18        | -0.10         | 0.3        | 0.11  | -0.16        | 0.33         | -0.64         | -0.13         |
| Ca         | <b>0.7</b> | -   | 0.6 | 0.75 | <b>0.77</b> | 0.16        | 0.11          | 0.0        | 0.68  | <b>0.83*</b> | <b>0.73*</b> | <b>-0.81*</b> | <b>-0.77*</b> |
| P          | 0.4        | 0.2 | 0.4 | 0.11 | 0.21        | 0.61        | -0.38         | 0.0        | 0.36  | 0.28         | 0.47         | <b>-0.78*</b> | -0.68         |
| Cr         | 0.6        | 0.3 | 0.4 | 0.34 | 0.39        | <b>0.82</b> | -0.09         | -          | 0.22  | 0.29         | 0.23         | -0.47         | <b>-0.71*</b> |
| Cu         | 0.0        | 0.1 | -   | 0.39 | 0.36        | 0.36        | -0.29         | -          | 0.07  | 0.10         | -0.28        | 0.28          | -0.28         |
| Fe         | 0.4        | 0.2 | 0.4 | 0.05 | 0.14        | <b>0.85</b> | -0.24         | 0.0        | 0.10  | 0.14         | 0.31         | -0.59         | -0.66         |
| Mn         | 0.0        | 0.0 | 0.6 | -    | -           | 0.62        | 0.06          | <b>0.7</b> | -0.47 | 0.12         | 0.48         | -0.40         | -0.30         |
| Zn         | -          | 0.1 | -   | -    | -           | 0.02        | -0.56         | 0.5        | -0.53 | -0.43        | 0.07         | -0.05         | 0.34          |
| Mo         | -          | 0.0 | -   | -    | -           | -           | -0.18         | 0.2        | -0.07 | -0.44        | -0.08        | 0.04          | 0.66          |

\* significant at  $p < 0.01$ .  $\alpha$ T—alfa tocopherol;  $\beta$ T+ $\gamma$ T—beta + gamma tocopherol;  $\delta$ T—delta tocopherol; TT—total tocopherols; OC—oil content; KW—kernel weight; KL—kernel length; KWd—kernel width; KT—kernel thickness; KR—kernel ratio; SVR—the sum of precipitation during vegetation; SMDTV—the sum of mean daily temperatures during vegetation; ASP—the annual sum of precipitation; ASMDT—the annual sum of mean daily temperatures; ADRHV—average daily relative humidity during vegetation; AADRH—annual average daily relative humidity; SMDRHV—the sum of mean daily relative humidity during vegetation; ASMDRH—the annual sum of mean daily relative humidity.

**Table S6.** Pearson's correlation coefficients (R) among kernel morphological characteristics and climate parameters (2015).

|             | KL  | KW   | KT  | KR         | SV  | SMD   | AS  | ASM   | ADR          | AAD          | SMDR          | ASMD         |
|-------------|-----|------|-----|------------|-----|-------|-----|-------|--------------|--------------|---------------|--------------|
| <b>KW</b>   | 0.4 | 0.62 | 0.6 | 0.6        | 0.2 | 0.17  | -   | 0.53  | 0.64         | 0.48         | -0.58         | -0.52        |
| <b>KL</b>   |     | 0.14 | -   | 0.0        | 0.1 | -0.34 | 0.4 | -0.27 | 0.12         | 0.25         | -0.11         | 0.25         |
| <b>KWd</b>  |     |      | 0.0 | 0.1        | 0.4 | 0.50  | 0.3 | 0.10  | 0.20         | 0.40         | -0.57         | -0.36        |
| <b>KT</b>   |     |      |     | <b>0.9</b> | 0.0 | 0.05  | -   | 0.63  | <b>0.85*</b> | 0.41         | -0.33         | -0.67        |
| <b>KR</b>   |     |      |     |            | 0.1 | -0.14 | -   | 0.53  | <b>0.94*</b> | 0.60         | -0.45         | -0.69        |
| <b>SVR</b>  |     |      |     |            |     | 0.04  | 0.0 | -0.25 | 0.05         | 0.12         | -0.25         | -0.58        |
| <b>SMDT</b> |     |      |     |            |     |       | -   | -0.01 | -0.26        | -0.42        | 0.30          | 0.11         |
| <b>ASP</b>  |     |      |     |            |     |       |     | -0.59 | 0.11         | 0.54         | -0.26         | 0.22         |
| <b>ASMD</b> |     |      |     |            |     |       |     |       | 0.49         | 0.25         | -0.52         | -0.53        |
| <b>ADRH</b> |     |      |     |            |     |       |     |       |              | <b>0.82*</b> | -0.64         | -0.66        |
| <b>AADR</b> |     |      |     |            |     |       |     |       |              |              | <b>-0.85*</b> | -0.54        |
| <b>SMDR</b> |     |      |     |            |     |       |     |       |              |              |               | <b>0.70*</b> |

\* significant at  $p < 0.01$ . KW—kernel weight; KL—kernel length; KWd—kernel width; KT—kernel thickness; KR—kernel ratio; SVR—the sum of precipitation during vegetation; SMDTV—the sum of mean daily temperatures during vegetation; ASP—the annual sum of precipitation; ASMDT—the annual sum of mean daily temperatures; ADRHV—average daily relative humidity during vegetation; AADRH—Annual average daily relative humidity; SMDRHV—the sum of mean daily relative humidity during vegetation; ASMDRH—the annual sum of mean daily relative humidity.
